# Supplementary material for: Absolute yeast mitochondrial proteome quantification reveals trade-off between biosynthesis and energy generation during diauxic shift
Source: PubMed Central journal article supplement — Proc Natl Acad Sci U S A. 2020 Mar 17;117(13):7524–35. doi: 10.1073/pnas.1918216117 (PMC7132131; doi:10.1073/pnas.1918216117), 2020-03-17
Supplement: pnas.1918216117.sapp.pdf [file pnas.1918216117.sapp.pdf]

# PNAS

www.pnas.org

1  
2 Supplementary Information for

3  
4 Absolute yeast mitochondrial proteome quantification reveals trade-off between biosynthesis and  
5 energy generation during diauxic shift

6  
7 Francesca Di Bartolomeo<sup># 1,2,3</sup>, Carl Malina<sup># 1,4</sup>, Kate Campbell<sup>1,2</sup>, Maurizio Mormino<sup>1</sup>, Johannes  
8 Fuchs<sup>5</sup>, Egor Vorontsov<sup>5</sup>, Claes M. Gustafsson<sup>6</sup>, Jens Nielsen<sup>\* 1,2,4,7,8</sup>

- 9  
10 1. Department of Biology and Biological Engineering, Chalmers University of Technology, SE-41296  
11 Gothenburg, Sweden  
12 2. Novo Nordisk Foundation Center for Biosustainability, Chalmers University of Technology, SE-  
13 41296 Gothenburg, Sweden  
14 3. Department of Biotechnology and Nanomedicine, SINTEF Industry, Richard Birkelands vei 3B  
15 7465 Trondheim, Norway  
16 4. Wallenberg Center for Protein Research, Chalmers University of Technology, SE-41296  
17 Gothenburg, Sweden  
18 5. Proteomics Core Facility, University of Gothenburg, SE-40530 Gothenburg, Sweden  
19 6. Institute of Biomedicine, University of Gothenburg, P.O. Box 440, SE-405 30 Gothenburg,  
20 Sweden  
21 7. Novo Nordisk Foundation Center for Biosustainability, Technical University of Denmark, DK-2800  
22 Lyngby, Denmark  
23 8. BioInnovation Institute, Ole Måløes Vej, DK2200 Copenhagen N, Denmark

24  
25 # Both authors contributed equally to this work

26  
27 \* Jens Nielsen (Corresponding author)

28  
29 **Email:** nielsenj@chalmers.se  
30 <http://orcid.org/0000-0002-9955-6003>

31  
32  
33 **This PDF file includes:**

34  
35       Supplementary Materials and Methods  
36       Figures S1 to S6  
37       Tables S1 to S2  
38       Legends for Datasets S1 to S7  
39       References for SI

40  
41 **Other supplementary materials for this manuscript include the following:**

42  
43       Datasets S1 to S7  
44

45 **Materials and Methods**

46

47 **Experimental Model**

48 All experiments were carried out using the prototrophic yeast *Saccharomyces*  
49 *cerevisiae* strain CEN.PK113-7D MitoLoc if not stated otherwise. For the  
50 integration of the fluorescent protein plasmid pMitoLoc (carrying preSu9-GFP and  
51 preCox4-mCherry genes) into *S. cerevisiae* CEN.PK 113-7D's genome, CRISPR-  
52 Cas9 integration was performed using the EasyClone-MarkerFree Vector Set (1).

53

54 **Media and growth conditions**

55 Batch cultivations were carried out in 2.5-litre bioreactors (DasGip GmbH, Jülich,  
56 Germany; working volume, 2 litres), equipped with off-gas O<sub>2</sub> and CO<sub>2</sub> sensors  
57 (BlueSens GmbH, Herten, Germany), pH, temperature and dissolved oxygen  
58 sensors. The minimal medium used contained per litre: 20 g glucose, 5 g  
59 (NH<sub>4</sub>)<sub>2</sub>SO<sub>4</sub>, 3 g KH<sub>2</sub>PO<sub>4</sub> and 0.5 g MgSO<sub>4</sub>·7H<sub>2</sub>O. Vitamins and trace metals were  
60 added to the medium after autoclaving. The final concentration of trace metals in  
61 the medium was, per litre: 15.0 mg EDTA, 4.5 mg ZnSO<sub>4</sub>·7H<sub>2</sub>O, 1 mg MnCl<sub>2</sub>·2H<sub>2</sub>O,  
62 0.3 g CoCl<sub>2</sub>·6H<sub>2</sub>O, 0.3 mg CuSO<sub>4</sub>·5H<sub>2</sub>O, 0.4 mg Na<sub>2</sub>MoO<sub>4</sub>·2H<sub>2</sub>O, 4.5 mg  
63 CaCl<sub>2</sub>·2H<sub>2</sub>O, 3.0 mg FeSO<sub>4</sub>·7H<sub>2</sub>O, 1.0 mg H<sub>3</sub>BO<sub>3</sub>, and 0.10 mg KI. The final  
64 concentration of vitamins in the medium was, per litre: 0.05 mg biotin, 0.2 mg p-  
65 aminobenzoic acid, 1 mg nicotinic acid, 1 mg Ca-pantothenate, 1 mg pyridoxine-  
66 HCl, 1 mg thiamine-HCl, 25 mg myo-inositol.

67 Cells were grown at 30°C at pH 5. Stirrer rate was 800 rpm, with an air-flow  
68 of 2 vvm, to give a dissolved oxygen tension (DOT) of at least 30%. Cultivations  
69 were monitored using off-gas analysis, pH, dO<sub>2</sub>, temperature and external O<sub>2</sub> and  
70 CO<sub>2</sub> sensors (BlueSens GmbH, Herten, Germany). Batch cultivations started at  
71 the defined conditions using 1% of overnight culture inoculum, giving an OD of 0.1.

72

73 **Dry weight and cell number determination**

74 For the determination of cell dry weight (CDW) and quantification of extracellular  
75 metabolites, samples of culture medium were collected at the time of inoculation,  
76 after two hours from inoculation and then every hour for 20 h after inoculation. The

77 measurement of CDW was performed by filtering 10 ml of culture using pre-  
78 weighed 0.45 µm PESU membrane filters (Sartorius AG, Göttingen, Germany) that  
79 were dried by microwave heating (150W, 15 min) and then further dried in a  
80 desiccator for one week before weight determination.

81 Cell number and volume were determined based on electrical current  
82 exclusion using a CASY cell counter (Roche Innovatis AG, Bielefeld, Germany). 1  
83 ml of cell culture was collected in pre-cooled Eppendorf tubes, then diluted 1/10<sup>2</sup>  
84 to 1/10<sup>4</sup> in an electrolyte/buffer (CASYton®, OLS OMNI Life Science, Bremen,  
85 Germany) and immediately analysed.

86

#### 87 **Sampling for proteomic analysis**

88 For the whole-cell proteomic analysis, 5 ml (after 9 h) and 2 ml each (after 13 and  
89 20 h) of cell culture was harvested into pre-cooled Falcon tubes and centrifuged (5  
90 min, 4°C, 1,000 x g), and washed using ice-cold 1X PBS. Cells were then collected  
91 by centrifugation (21,000 x g, 30 s, 4°C), snap-frozen and stored at -80°C.

92

#### 93 **HPLC analysis of exometabolites**

94 For the exometabolite analysis, 1 ml of culture was collected, filtered through a  
95 0.45 µm nylon membrane filters (VWR, Radnor, PA, USA) and immediately stored  
96 at -20°C. All samples were analysed on an Ultimate 3000 HPLC system (Thermo  
97 Fisher Scientific, Waltham, MA, USA), equipped with a Bio-Rad (Hercules, CA,  
98 USA) HPX-87H column and a RI detector used for the detection and quantification  
99 of glucose and ethanol. Isocratic elution using 5 mM H<sub>2</sub>SO<sub>4</sub> as eluent at a flow rate  
100 of 0.6 ml/min, and a column temperature of 45°C was used.

101

#### 102 **Cell confocal imaging**

103 For the morphological analysis of yeast mitochondria, 500 µl of cell culture was  
104 harvested for each condition using ice-cold Eppendorf tubes. Cells were then  
105 washed with 1 ml ice-cold 1X PBA and chemically fixed using 500 µl of 4 g/l  
106 paraformaldehyde (PFA) in 3.6% sucrose solution and incubated at room  
107 temperature for 20 min.

108 After incubation with PFA, cells were washed twice with 1X PBA and  
109 resuspended in 20  $\mu$ l of Vectashield mounting medium (Vector Labs Inc.,  
110 Burlingame, CA, USA) and stored at 4°C. Prior to analysis, samples were diluted  
111 1:20 in 20  $\mu$ l Vectashield. Fixed and live cells were visualized using a Nikon A1  
112 confocal fluorescent microscope (Nikon Instruments Inc, Melville, NY, USA),  
113 equipped with a CFI Apo  $\lambda$ S 60x oil objective with nano-crystal coat and A1-F filter  
114 Cube (EX: 450/50; DM: 525/50; EM: 595/5 700/75), using 3.5  $\mu$ l of sample applied  
115 to 10x poly-L-lysine coated slides. For each marker, the fluorescence was  
116 separated by excitation (eGFP: 488 nm; mCherry: 561 nm), with a minimum of 50  
117 cells per condition imaged. Z-stacks were acquired with a step of 0.125  $\mu$ m. For  
118 the measurement of the mitochondrial volume, images derived from Z-stack  
119 acquisition were first deconvolved using the automatic deconvolution tool of the  
120 NIS-Elements software (Version 4.11.0, Nikon Instruments Inc., Melville, NY,  
121 USA), the calculation of the volumes was performed by the NIS-Elements AR  
122 Measurement, part of the NIS-Elements software, which automatically calculated  
123 the volumes using measured area of the Z-stacks generated. The collected images  
124 were further analysed for the determination of the whole cell volume using ImageJ.  
125 For the creation of a 3D model of the Nikon A1 dedicated software, NIS-Elements  
126 Viewer was used for the conversion of the Z-stacks into a 3D model as shown in  
127 Figure 2c-e.

128

### 129 **Mitochondria isolation**

130 Isolation of mitochondria was performed immediately after cell biomass sampling  
131 for whole-cell proteome analysis. Cells were harvested by centrifugation (5 min,  
132 3,000 x g), then the pellet was resuspended in deionized water, followed by  
133 centrifugation again (5 min at 3,000 x g). Cells were incubated for 20 min at 30°C  
134 in 2 ml of Buffer A (100 mM Tris-H<sub>2</sub>SO<sub>4</sub> pH 9.4, 10 mM DTT) per g of cell wet  
135 weight. Cells harvested after this step were then incubated with 7 ml/g cell wet  
136 weight zymolyase buffer (1.2 M sorbitol, 20 mM K<sub>3</sub>PO<sub>4</sub> pH 7.4, 6 mg Zymolyase  
137 per cell wet weight 20-T, MP Biomedicals Life Sciences, Santa Ana, CA, USA),  
138 with the lytic activity of Zymolyase being used to digest the cell wall and create

139 spheroplasts, as confirmed by bright field microscopy. Cells were incubated with  
140 shaking for 1 hour at 30°C, and then all subsequent steps were carried out at 4°C.  
141 Spheroplasts were centrifuged for 5 min at 3000 x g, resuspended in 7ml/g sorbitol  
142 buffer (0.6 M sorbitol, 10 mM Tris-HCl pH 7.4, 1mM PMSF) and homogenised  
143 using a PYREX® Dounce Tissue Grinder (20 strokes for 3 times; Corning Inc.,  
144 Corning, NY, USA). (The homogenisation step being used in order to open the  
145 cells and release intact organelles). The proceeding steps of differential  
146 centrifugation were then performed to determine the specific isolation of  
147 mitochondria based on their buoyant density. The cell lysate was centrifuged (5  
148 min, 1,500 x g), followed by centrifugation of the supernatants (5 min, 4,000 x g).  
149 Crude mitochondrial fractions were pelleted by centrifugation (15 min, 12,000 x g),  
150 then mitochondrial pellets were resuspended in sucrose buffer (250 mM sucrose,  
151 1mM EDTA, 10 mM MOPS-KOH, pH 7.2), and followed by a higher purity  
152 purification step using the Qproteome Mitochondria Isolation Kit (QIAGEN, Hilden,  
153 Germany). The mitochondrial fractions were finally shock-frozen in liquid nitrogen  
154 and stored at -80°C. The enrichment analysis of the mitochondrial fraction isolated  
155 at the different stages of the cell growth was performed via Western Blot analysis  
156 (2). Prior to protein immunoblotting, the protein concentration of the mitochondrial  
157 samples was determined using the Lowry-based DC™ Protein Assay (Bio-Rad,  
158 Hercules, CA, USA).

159

#### 160 **Mitochondrial Lipidomics**

161 All solvents were purchased from Sigma – Aldrich (Merck, Kenilworth, NJ, USA).  
162 Mitochondrial lipid extraction was performed for all conditions and replicates by  
163 taking from each sample 1 mg mitochondrial protein previously measured using  
164 the DC™ Protein Assay (Bio-Rad). Before lipid extraction, the purified  
165 mitochondrial extracts were mixed with 20 µl of internal lipid standard (IS, Avanti  
166 polar lipids, Alabaster, AL, USA), providing a concentration of: 0.07 ppm of  
167 phosphatidylserine (PS) 17:0-14:1, 1.00 ppm of phosphatidylinositol (PI) 17:0-  
168 14:1, 0.22 ppm of phosphatidylglycerol (PG) 17:0-14:1, 0.80 ppm of  
169 phosphatidylethanolamine (PE) 17:0-14:1, 0.85 ppm of phosphatidylcholine (PC)

170 17:0-14:1, 0.17 ppm of lysophosphatidic acid (LPA) 17:1, 0.43 ppm of phosphatidic  
171 acid (PA) 17:0, 1.20 ppm of diacylglycerol (DG) 10:0, 0.13 ppm of  
172 lysophosphatidylcholine (LPC) 17:1, 0.24 ppm of lysophosphatidylethanolamine  
173 (LPE) 17:1, 0.20 ppm of lysophosphatidylserine (LPS) 17:1, 0.16 ppm of  
174 lysophosphatidylinositol (LPI) 17:1, 0.17 ppm of ceramide (Cer) d18:1/17:0, 0.33  
175 ppm of triacylglycerol (TG) 17:0-17:1-17:0, 0.58 ppm of Cardiolipin (CL) Mix I  
176 (14:1(3)-15:1 CL 15:0(3)-16:1 CL 22:1(3)-14:1 CL 24:1(3)-14:1 CL). The sample  
177 extraction was performed using the Methyl Tert-Butyl Ether (MTBE) method  
178 described as follows (3). Initially, 1.5 ml methanol was added to sample aliquots  
179 and vortexed for 15 min. Next, 5 ml of MTBE was added to the mixture that was  
180 then incubated for 1 h at room temperature. Following the addition of 1.25 ml MQ  
181 water, samples were incubated for 15 min then centrifuged (1500 x g, 10 min),  
182 inducing phase separation within the samples. First the upper organic phase was  
183 collected, then the entire extraction procedure was repeated on the lower phase.  
184 At the end of the subsequent extraction, the combined organic phases were dried,  
185 and lipids extracted and dissolved in 200 µl chloroform/methanol/water mixture  
186 (60/30/4.5 - v/v/v) and stored at -20°C until further analysis.

187 Before proceeding with lipid detection, a calibration curve was prepared with  
188 8 concentrations points (from 0.1 to 7.5 µg/ml), using the internal lipid standard  
189 previously described. For sample analysis, an ultra-high-performance liquid  
190 chromatography-quadrupole time-of-flight mass spectrometry (UHPLC/Q-TOF-  
191 MS) was performed using a 1290 Infinity UHPLC (Agilent Technologies, Santa  
192 Clara, CA, USA) and column UPLC BEH C18, 2.1 x100 1.7 µm (Column ID CMSI-  
193 HPLC-042; Waters Acquity, Milford, MA, USA). Mobile Phase A consisted of: MQ  
194 water + 1% 1M NH<sub>4</sub>CO<sub>2</sub>H + 0.1% HCO<sub>2</sub>H, Mobile Phase B:  
195 acetonitrile:isopropanol (1:1, v/v) + 1M NH<sub>4</sub>CO<sub>2</sub>H + 0.1% HCO<sub>2</sub>H.

196 A linear gradient from 35% to 80% was applied for solvent B over 2 min  
197 followed by an increase to 100% B over 5 min. The temperature of the column was  
198 kept at 50°C and the injection volume was of 1 µl per sample, with each sample  
199 being analysed in triplicate. For the Q-TOF-MS we used QTOF 6520 Agilent  
200 instrument with electrospray ionization (ESI), MS scan m/z 100-1700, collecting

201 1.67 spectra/sec in positive mode. Pooled extract of mitochondria isolated during  
202 the glucose phase samples was injected six times as quality control (QC). Using  
203 the Agilent Profinder, the mass, retention time (RT), and area of the IS were  
204 extracted from each injection with a % relative standard deviation (RSD) below 10.  
205 Finally, 106 lipids were identified from the mitochondrial extract using LipidMatch  
206 (4). To perform relative quantitation, each identified lipid was quantified using the  
207 calibration standard from the same class or group and also based on the RT. The  
208 concentration ratio, calculated from the calibration curve, was multiplied by the IS  
209 concentration to acquire the concentration ( $\mu\text{g/ml}$ ).

210

#### 211 **Protein extraction for proteomic analysis**

212 1 mg of yeast cell pellets and mitochondria pellets in 500  $\mu\text{L}$  of lysis buffer (50 mM  
213 triethylammonium bicarbonate (TEAB), 2 % sodium dodecyl sulfate (SDS)) were  
214 lysed, respectively. Samples were homogenized using a FastPrep<sup>®</sup>-24 instrument  
215 (Matrix-C (red) FAST tubes MP Biomedicals, OH, USA) for 5 repeated 40 second  
216 cycles at 6.5 m/s, with 30-60 second pauses in between. Samples were  
217 centrifuged (400 x g, 2 min) then supernatants were transferred to new Eppendorf  
218 tubes. The supernatants were centrifuged again (21,100 x g, 10 min) to remove  
219 cell debris then supernatants were transferred to new Eppendorf tubes again.  
220 Protein concentration was determined using Pierce<sup>™</sup> BCA Protein Assay Kit  
221 (Thermo Fisher Scientific, Waltham, MA, USA) and the Benchmark<sup>™</sup> Plus  
222 microplate reader (Bio-Rad, Hercules, CA, USA) with bovine serum albumin (BSA)  
223 solutions as standards. The reference pool of mitochondrial samples for  
224 quantification was prepared by combining equal amounts of all mitochondrial  
225 samples. The whole-cell-proteome reference pool was prepared from the aliquots  
226 of lysates from samples of all conditions analysed.

227

#### 228 **Tryptic Digestion and TMT (tandem mass tags) labelling of proteins**

229 Aliquots containing 25  $\mu\text{g}$  of total protein from each sample and 25  $\mu\text{g}$  from the  
230 reference pool were used for the TMT sample preparation; 50  $\mu\text{g}$  of the pooled  
231 mitochondrial sample was spiked with 10.6  $\mu\text{g}$  of the UPS2 Proteomics Dynamic  
232 Range Standard Set (Sigma-Aldrich, Saint-Louis, MO) for label-free quantification.



233 Samples were reduced by the addition of 2 M DL-dithiothreitol (DTT) to a final  
234 concentration of 100 mM and incubated at 56°C for 30 min. The samples were  
235 then trypsin digested using the filter-aided sample preparation (FASP) method  
236 modified from Wiśniewski *et al.* (2009) (5). In brief, reduced samples, which had  
237 been diluted to 500 µl by addition of 8M urea, were applied on Nanosep® 30k  
238 Omega filters (Pall Life Sciences, Port Washington, NY, USA) then 200 µl 8M urea  
239 was used to repeatedly wash away the SDS. Alkylation was performed with 10 mM  
240 methyl methanethiosulfonate (MMTS) diluted in digestion buffer (1% sodium  
241 deoxycholate (SDC), 50 mM TEAB) for 30 min at room temperature and filters  
242 were then repeatedly washed with digestion buffer. Trypsin (Pierce Trypsin  
243 Protease, MS Grade, Thermo Fisher Scientific, Waltham, MA, USA) in digestion  
244 buffer was added in a ratio of 1:100 relative to protein amount and then samples  
245 were incubated at 37°C overnight. Another portion of trypsin was then added and  
246 incubated for 3 h. Peptides were collected by centrifugation (21,100 x g, 10 min)  
247 and subjected to isobaric mass tagging reagent TMT® according to the  
248 manufacturer's instructions (Thermo Fisher Scientific, Waltham, MA, USA). The  
249 labelled samples were combined with the TMT sets, and then samples were  
250 concentrated using vacuum centrifugation with SDC being removed by  
251 acidification with 10% TFA.

252 The TMT-sets were fractionated into 44 primary fractions by basic reversed-  
253 phase chromatography (bRP-LC) using a Dionex Ultimate 3000 UPLC system  
254 (Thermo Fischer Scientific, Waltham, MA, USA). Peptide separations were  
255 performed using a reversed-phase XBridge BEH C18 column (3.5 µm, 3.0x150  
256 mm, Waters Corporation) and a linear gradient from 3% to 40% solvent B over 17  
257 min followed by an increase to 100% B over 5 min. Solvent A was 10 mM  
258 ammonium formate buffer at pH 10.00 and solvent B was 90% acetonitrile, 10%  
259 10 mM ammonium formate at pH 10.00. The primary fractions were concatenated  
260 into final 20 fractions, evaporated and reconstituted in 15 µl of 3% acetonitrile, 0.2%  
261 formic acid for nLC MS analysis.

262 The pooled sample for the label-free quantification was fractionated into 44  
263 primary fractions as described above, but the primary fractions were concatenated

264 into 10 final fractions. The combined fraction (16+17+36+37) was treated using the  
265 HiPPR Pierce detergent removal kit (Thermo Fisher Scientific, Waltham, MA, USA)  
266 and 25mM TEAB as an exchange buffer. The final fractions were evaporated and  
267 reconstituted in 15  $\mu$ l of 3% acetonitrile, 0.2% formic acid for nLC MS analysis.

268

#### 269 **LC-MS/MS Analysis**

270 Fractions were analysed on an Orbitrap Fusion Tribrid mass spectrometer  
271 interfaced with Easy-nLC1200 liquid chromatography system (both Thermo Fisher  
272 Scientific, Waltham, MA, USA). Peptides were trapped on an Acclaim Pepmap 100  
273 C18 trap column (100  $\mu$ m x 2 cm, particle size 5  $\mu$ m, Thermo Fischer Scientific)  
274 and separated on an in-house packed analytical column (75  $\mu$ m x 30 cm, particle  
275 size 3  $\mu$ m, Reprosil-Pur C18, Dr. Maisch) using a linear gradient from 5% to 35%  
276 B over 75 min followed by an increase to 100% B for 5 min at a flow of 300 nL/min.  
277 Solvent A was 0.2% formic acid in water and solvent B was 80% acetonitrile, 0.2%  
278 formic acid. For the TMT-labelled peptides, MS scans were performed at 120 000  
279 resolution, m/z range 380-1380, MS/MS analysis was performed in a data-  
280 dependent, with top speed cycle of 3 s for the most intense doubly or multiply  
281 charged precursor ions. Most intense precursors were fragmented in MS2 by  
282 collision induced dissociation (CID) at 35 collision energy with a maximum injection  
283 time of 50 ms, and detected in the ion trap followed by multinotch (simultaneous)  
284 isolation of the top 10 MS2 fragment ions, with m/z 400-1400, selected for  
285 fragmentation (MS3) by higher-energy collision dissociation (HCD) at 60% and  
286 detection in the Orbitrap at 50,000 resolution, m/z range 100-500. Precursors were  
287 isolated in the quadrupole with a 0.7 m/z isolation window and dynamic exclusion  
288 within 10 ppm, for 45 seconds being used for m/z-values already selected for  
289 fragmentation. For label-free quantification, MS3 fragmentation was not  
290 performed, and the same MS1 and MS2 scan settings were used, aside from the  
291 precursor isolation window of 1.2 m/z and the top speed duty cycle of 1 s.

292

#### 293 **Data matching for protein identification and relative quantification**

294 MS raw data files for each TMT set were merged for identification and relative  
295 quantification using Proteome Discoverer version 2.2 (Thermo Fisher Scientific,

296 Waltham, MA, USA). The *Saccharomyces cerevisiae* ATCC 204508 / S288c  
297 reference proteome database was downloaded from Uniprot (6) (February 2018,  
298 6049 sequences) and used for the database search on the TMT files. The  
299 concatenated database containing the above-mentioned sequences and the 48  
300 UPS protein sequences was used for the processing of the UPS2-spiked reference  
301 files. A database search for each set was performed using the Mascot search  
302 engine (Matrix Science, London, UK) with MS peptide tolerance of 5 ppm and  
303 MS/MS tolerance for identification of 600 millimass units (mmu). Tryptic peptides  
304 were accepted with 1 missed cleavage. Variable modifications of methionine  
305 oxidation, and fixed modifications of cysteine methylthiolation were used for all  
306 searches. TMT-6 on lysine and peptide N-termini was set as a fixed modification  
307 for the TMT-labelled peptides. Percolator was used for the peptide-spectrum  
308 match (PSM) validation with the strict false discovery rate (FDR) threshold of 1%.

309 Quantification was performed in Proteome Discoverer 2.2, Minora feature  
310 detection node was used for precursor ion quantification in the label-free  
311 experiments, with the maximum intensity values used for quantification.  
312 Abundance values for all unique and shared peptides were used for the IBAQ  
313 calculation. Abundances from the 3 technical replicates were averaged and divided  
314 by the number of theoretically observable peptides for a protein to yield the IBAQ  
315 intensity (the number of observable peptides being calculated using an in-house  
316 Python script). The known absolute amount values of the UPS2 standard proteins  
317 were used to scale the Log-transformed IBAQ intensity values versus Log-  
318 transformed protein concentration. Only UPS2 proteins with at least 2 identified  
319 unique peptides were used for scaling. For the relative quantification of the TMT-  
320 labelled samples, the TMT reporter ions were identified in the MS3 higher energy  
321 collisional dissociation (HCD) spectra with a mass tolerance of 3 milli mass units  
322 (mmu), the signal-to-noise (S/N) abundances of the reporter ions for the unique  
323 peptides were used for relative quantification. The resulting TMT reporter  
324 abundance values for each sample were normalized within Proteome Discoverer  
325 2.2 to the total peptide amount.

326

327 **Statistical test**

328 Unless indicated otherwise, all statistical tests were carried out using the Welch's t-  
329 test. Graphics and statistical computing were performed using the software  
330 environment R (7).

331

332

333

334

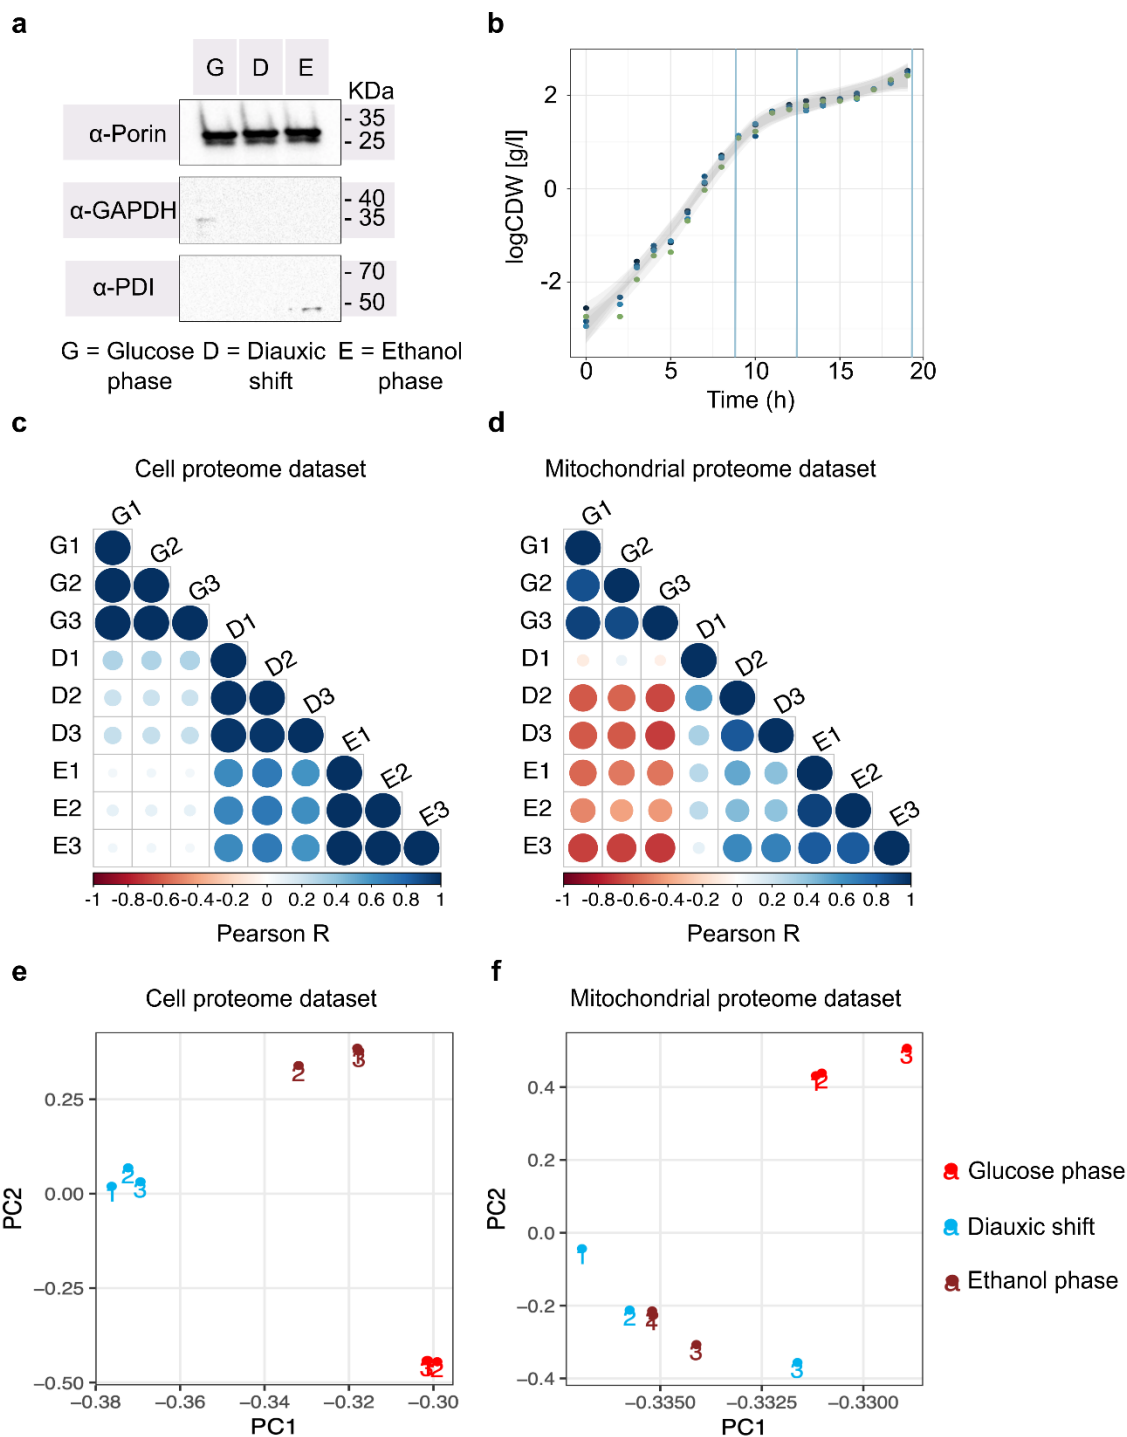

335  
 336  
 337  
 338  
 339  
 340  
 341

**Fig. S1**  
**Validation of and comparisons between samples**  
**and replicates for mitochondrial proteome analysis**

**a**, Verification of mitochondrial enrichment by Western blot analysis. Following mitochondria isolation, aliquots of crude mitochondria extracts from the three growth stages were subjected to protein extraction via TCA precipitation. 20  $\mu$ g of mitochondrial

342 proteins were separated using Gradient SDS Polyacrylamide Gel and then probed with  
343 antibodies specific for markers for mitochondria enrichment (porin) and cytosol  
344 contamination and ER contamination (respectively glyceraldehyde 3-phosphate  
345 dehydrogenase, GAPDH, and protein disulfide isomerase, PDI).  
346 **b**, Yeast growth and biomass increase expressed as the logarithm of the cell dry weight  
347 (CDW) in grams per litre of culture. The blue vertical lines correspond to the time chosen  
348 for the yeast cell harvesting and mitochondrial isolation (number of biological  
349 replicates=4).  
350 **c-d**, Correlogram representing Pearson's correlation coefficient (R) between the three  
351 biological replicates of the cellular and mitochondrial absolute proteomic datasets. G1; G2  
352 and G3 = samples collected during glucose phase (9 hours from the inoculation). D1; D2  
353 and D3 = samples collected during the diauxic shift (13 hours from the inoculation). E1;  
354 E2 and E3 = samples collected during the ethanol phase (20 hours from the inoculation).  
355 The intensity of the colour in the right bar indicates the degree of correlation.  
356 **e-f**, Principal component analysis (PCA) of cellular and mitochondrial proteomic data  
357 according to biological replicates and the metabolic growth phase. **e**, The first principal  
358 component explains 73.25 % of the variance, while the second principal component  
359 explains 21.21%. **f**, The first principal component is accounting for 95.07% and the second  
360 principal component is accounting for 3.15% of the total variation  
361  
362

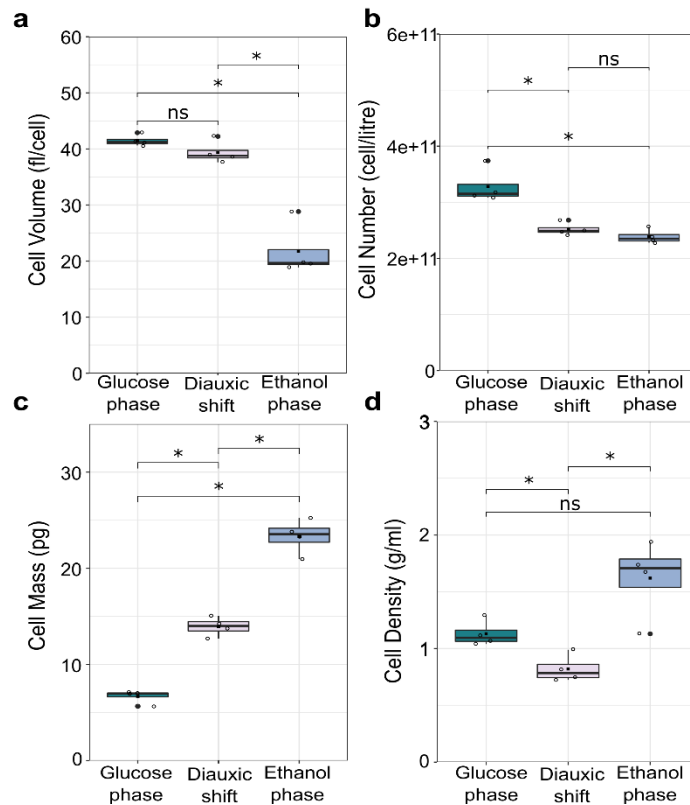

**Fig. S2**

**Biophysical properties of cells during changes in metabolism**

**a-b**, Cell volume and cell number were measured by electric current exclusion using the CASY capillary particle cell counter, using four biological replicates of samples collected during the glucose phase, diauxic shift and ethanol phase. Due to the high-throughput nature of the CASY instrument, each replicate included measurement of ~ 10,000 cells/run.

**c**, Mass per cell unit, measured by dividing cell dry weight (CDW), which was measured every two hours during cell growth, by the cell number.

**d**, Cell density as determined by dividing cell mass by cell volume for each condition. Here, individual cell mass was determined by dividing cell wet weight (CWW) over total cell number.

Samples were measured for each condition (n=3) and biological replicate (n=4). Statistical analyses were performed using paired *t*-test. Statistically significant differences are indicated as follows: ns (not significant)  $p < 1$ ; \* $p < 0.05$ ; \*\* $p < 0.01$ ; \*\*\* $p < 0.001$ ; \*\*\*\* $p < 0.0001$ .

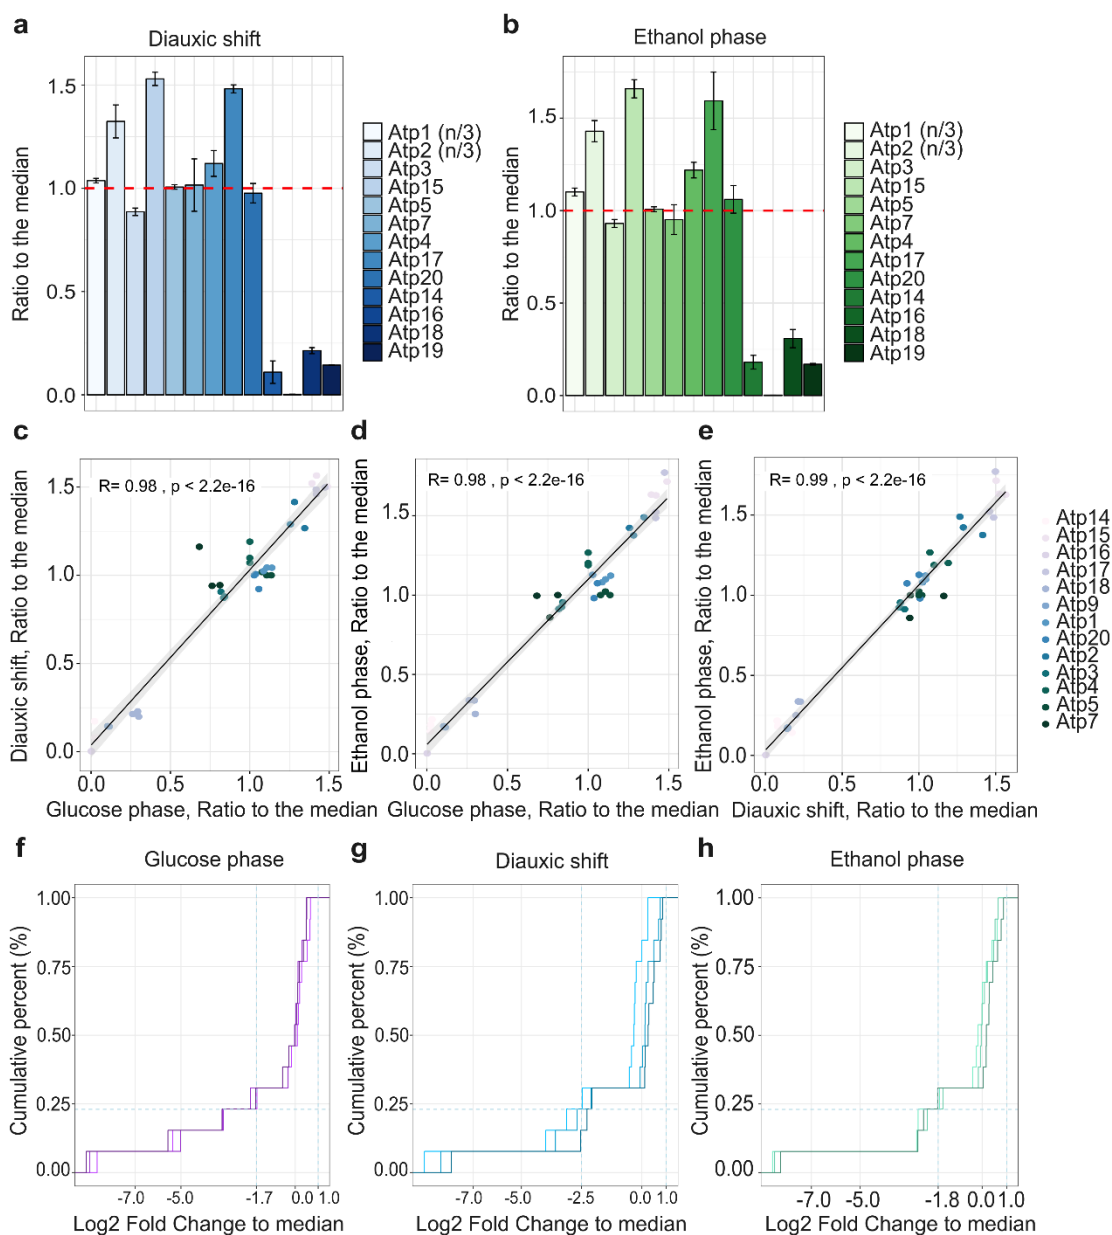

383  
 384  
 385  
 386  
 387  
 388  
 389  
 390  
 391  
 392  
 393  
 394  
 395

**Fig. S3**

**Stoichiometry of the ATP synthase complexes inferred by absolute proteome data**

**a-b**, Stoichiometry of the subunits of ATP synthase in the diauxic shift (**a**) and ethanol phase (**b**), expressed as the ratio to the median, taking the theoretical stoichiometry of *ATP1* and *ATP2* (3 subunits per complex) into account. Data were calculated as the mean of three biological replicates. Subunits are represented by different bar fill colour.

**c-e**, Comparison of the stoichiometry of the ATP synthase subunits between the three stages of growth. Different point colours represent the subunits.

**f-h**, Cumulative percentage distribution of the stoichiometric correlation among the ATP synthase complex's subunits versus the Log<sub>2</sub> fold change from the median during the glucose phase, diauxic shift and ethanol phase. Each graph shows three biological replicates for each condition.



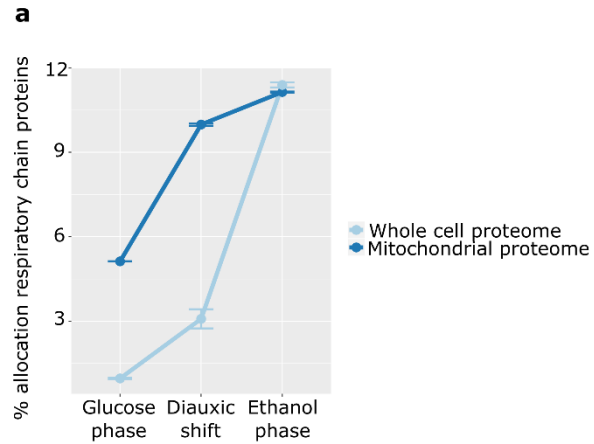

396  
397  
398  
399  
400  
401  
402  
403  
404

**Fig. S4**

**Comparison between the percentage allocation of the respiratory chain protein complexes in the mitochondrial and cellular proteome during glucose phase, diauxic shift and ethanol phase of yeast growth**

**a**, Protein complexes of the respiratory chain in mitochondrial protein and whole-cell proteome in the three stages of growth, calculated as the mean percentage allocation. Data are mean  $\pm$  SD of three biological replicates.

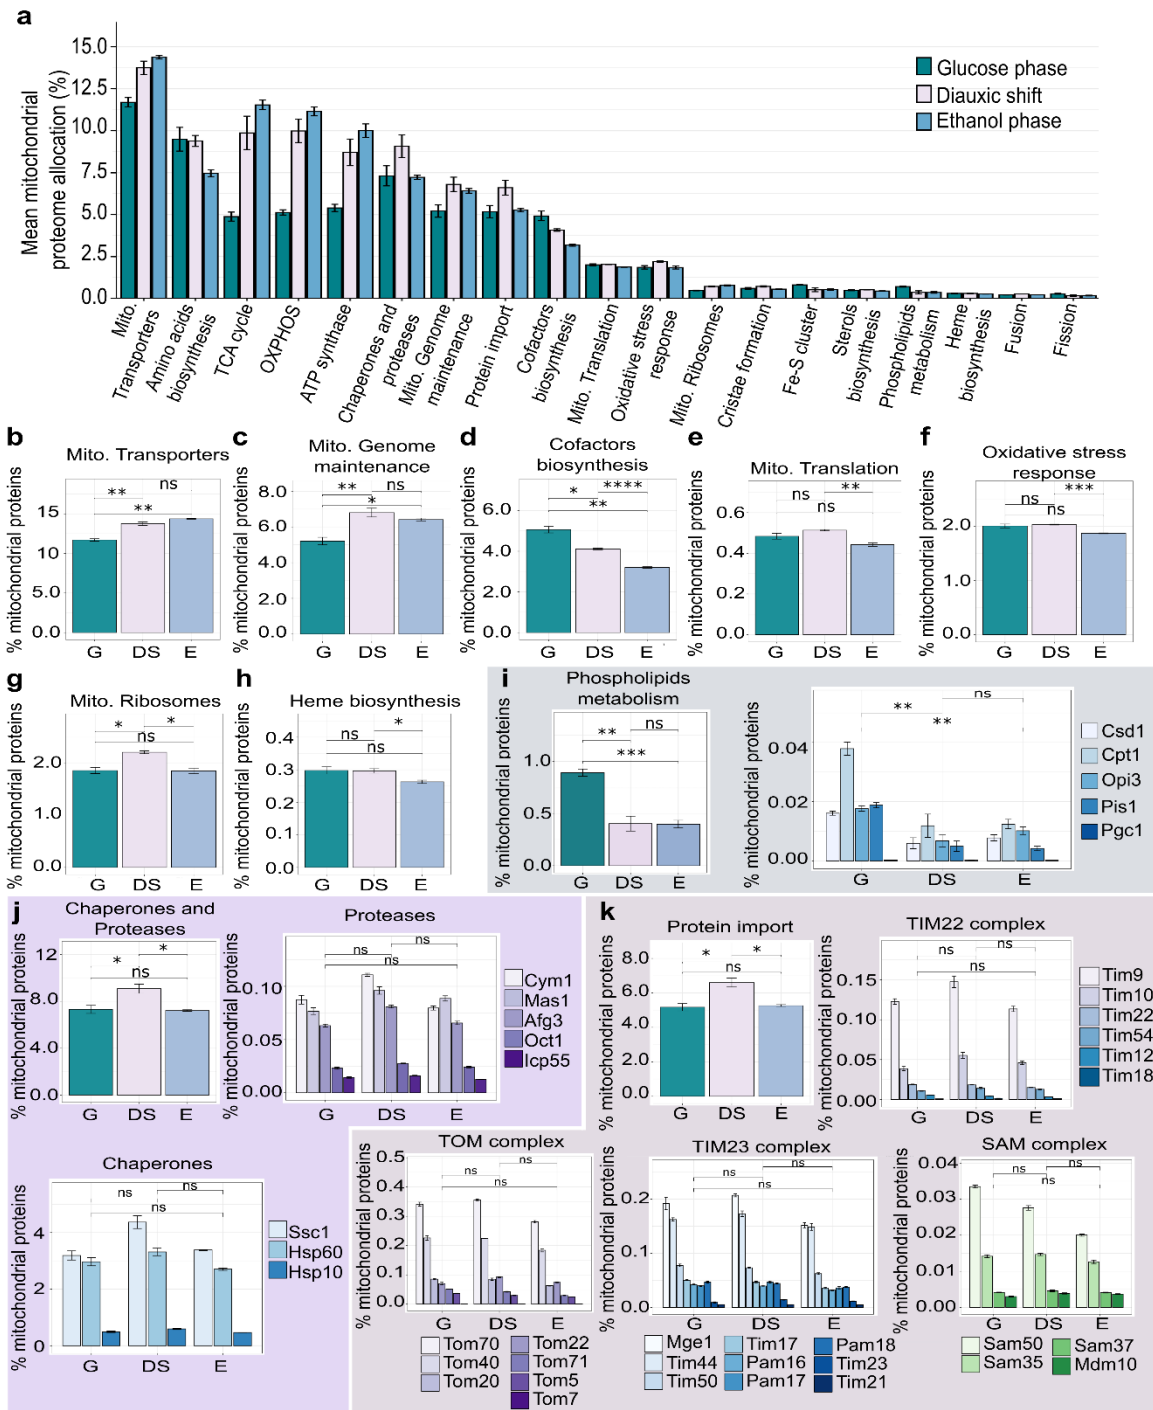

405  
406  
407  
408  
409  
410  
411  
412  
413

**Fig. S5**

**Overall mitochondria proteome allocation and focus on the nine functional groups and details on the phospholipid metabolism and protein import machinery**

**a**, Allocation of the whole mitochondrial proteome in the three stages of growth, calculated as the mean percentage allocation. Data are mean  $\pm$  SD of three biological replicates. The specific identifications are reported in Dataset S7.

**b-h**, Allocation of selected mitochondrial processes. Data are mean  $\pm$  SD of three biological replicates. Statistical analyses were performed using paired *t*-test.

414 **i**, Allocation of mitochondrial proteins involved in the phospholipid's metabolism  
415 with a focus on the enzymes Cds1, Cpt1, Opi3, Pis1 and Pgc1 involved in the biosynthesis  
416 of the bilayer-forming phospholipids PC, PI and PG. Data are mean  $\pm$  SD of three  
417 biological replicates. Statistical analyses were performed using paired *t*-test.  
418 **j**, Allocation of mitochondrial chaperones and proteases involved in the mechanisms of  
419 protein import with focus on the proteases Cym1, Mas1, Afg3, Oct1 and Icp55 and the  
420 chaperones Ssc1, Hsp60 and Hsp10. Data are mean  $\pm$  SD of three biological replicates.  
421 Statistical analyses were performed using paired *t*-test.  
422 **k**, Allocation of mitochondrial proteins involved in the mitochondrial import machinery  
423 with a focus on the protein forming the SAM, TIM23, TIM22 and TOM complexes. Data  
424 are mean  $\pm$  SD of three biological replicates. Statistical analyses were performed using  
425 paired *t*-test.  
426 Statistically significant differences are indicated as follows: ns  $p < 1$ ; \* $p < 0.05$ ; \*\* $p < 0.01$ ;  
427 \*\*\* $p < 0.001$ ; \*\*\*\* $p < 0.0001$ .  
428 G, glucose phase; DS, diauxic shift; E, ethanol phase.  
429 PC, phosphatidylcholine; PI, phosphatidylinositol; PG, phosphatidylglycerol.  
430  
431

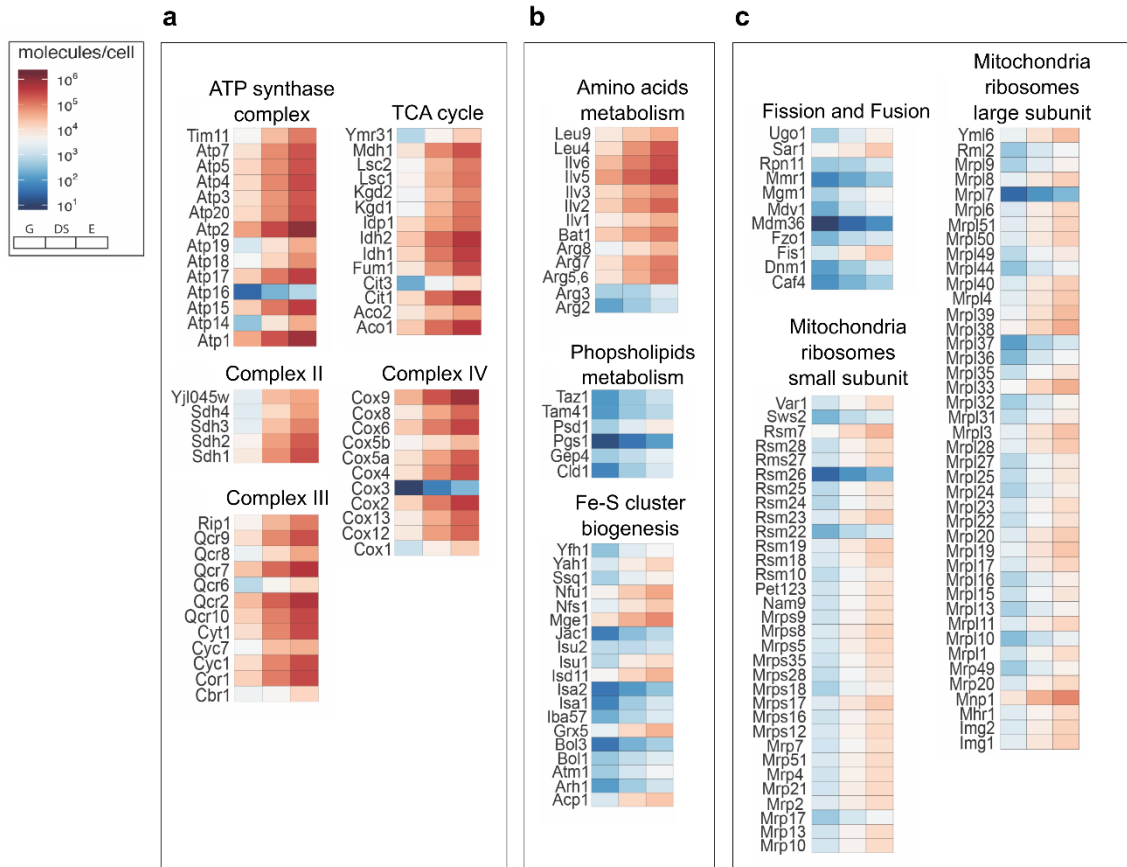

432  
433  
434  
435  
436  
437  
438  
439  
440  
441  
442  
443

**Fig. S6**

**Absolute quantification of the growth stage-dependent mitochondrial proteome**

Absolute copy numbers of proteins in selected mitochondrial processes in the three stages of growth. Colours indicate the mean absolute copy number per cell and growth stage (n = 3).

**a**, Proteins involved in the respiratory chain, oxidative phosphorylation complexes and the TCA cycle.

**b**, Biosynthetic processes. **c**, Processes involved in mitochondrial biogenesis.

G, glucose phase; DS, diauxic shift; E, ethanol phase; TCA, tricarboxylic acid cycle; Fe-S, iron-sulfur

444 **Table S1**  
 445 Yeast strains used in this study  
 446

| Organism                                             | Description                                                             | Source     |
|------------------------------------------------------|-------------------------------------------------------------------------|------------|
| <i>Saccharomyces cerevisiae</i> CEN.PK113-7D         | MATa, URA3, HIS3, LEU2, TRP1, MAL2-8c, SUC2                             | Euroscarf  |
| <i>Saccharomyces cerevisiae</i> CEN.PK113-7D MitoLoc | MATa, URA3, HIS3, LEU2, TRP1, MAL2-8c, SUC2 preSu9-GFP, preCox4-mCherry | This study |

447  
 448 **Table S2**  
 449 Plasmids used in this study for the generation of the strain *Saccharomyces*  
 450 *cerevisiae* CEN.PK113-7D MitoLoc  
 451

| Organism         | Description                                                                                                                                                           | Source                                  |
|------------------|-----------------------------------------------------------------------------------------------------------------------------------------------------------------------|-----------------------------------------|
| pMitoLoc         | 2 $\mu$ vector with preSu9-GFP and preCox4-mCherry fluorescent markers for colocalization analysis of yeast mitochondria, with nourseothricin (NAT) resistance marker | Vowinckel <i>et al.</i> , (2015) (8)    |
| pCfB3035         | 2 $\mu$ X-4 EasyClone-Marker Free backbone vector for genomic insertion of 1-2 genes and promoters into chromosome X-site 4 (236336..237310)                          | Jessop-Fabre <i>et al.</i> , (2016) (1) |
| pCfB3035 MitoLoc | pCfB3035 preSu9-GFP, preCox4-mCherry                                                                                                                                  | This study                              |
| pCfB2312         | 2 $\mu$ vector with TEF1-promoter-driven Cas9 protein and CYC terminator with kanMX resistance marker                                                                 | Jessop-Fabre <i>et al.</i> , (2016) (1) |
| pCfB3042         | 2 $\mu$ EasyClone-MarkerFree guiding RNA (gRNA) vector for directing Cas9 to cut at site X-4                                                                          | Jessop-Fabre <i>et al.</i> , (2016) (1) |

452  
 453  
 454

455

## References

- 456 1. M. M. Jessop-Fabre, *et al.*, EasyClone-MarkerFree: A vector toolkit for marker-less integration  
457 of genes into *Saccharomyces cerevisiae* via CRISPR-Cas9. *Biotechnol J* **11**, 1110–1117  
458 (2016).
- 459 2. T. Mahmood, P.-C. Yang, Western blot: technique, theory, and trouble shooting. *N Am J Med*  
460 *Sci* **4**, 429–434 (2012).
- 461 3. V. Matyash, G. Liebisch, T. V. Kurzchalia, A. Shevchenko, D. Schwudke, Lipid extraction by  
462 methyl-tert-butyl ether for high-throughput lipidomics. *J. Lipid Res.* **49**, 1137–1146 (2008).
- 463 4. J. P. Koelmel, *et al.*, LipidMatch: an automated workflow for rule-based lipid identification using  
464 untargeted high-resolution tandem mass spectrometry data. *BMC Bioinformatics* **18**, 331  
465 (2017).
- 466 5. J. R. Wiśniewski, A. Zougman, N. Nagaraj, M. Mann, Universal sample preparation method for  
467 proteome analysis. *Nat. Methods* **6**, 359–362 (2009).
- 468 6. The UniProt Consortium. UniProt: a worldwide hub of protein knowledge. *Nucleic Acids Res*  
469 **47**, D506–D515 (2019).
- 470 7. R Core Team. R: a language and environment for statistical computing. **R Foundation for**  
471 **Statistical Computing, Vienna, Austria.** URL <http://www.R-project.org/> (2013).
- 472 8. J. Vowinckel, J. Hartl, R. Butler, M. Ralser, MitoLoc: A method for the simultaneous  
473 quantification of mitochondrial network morphology and membrane potential in single cells.  
474 *Mitochondrion* **24**, 77–86 (2015).

475

476 **Dataset S1** (data provided in a separate file)

477 Absolute mitochondrial proteome for the three biological replicate samples during the  
478 glucose phase, diauxic shift and ethanol phase.

479

480 **Dataset S2** (data provided in a separate file)

481 Absolute cellular proteome for the three biological replicate samples during the glucose  
482 phase, diauxic shift and ethanol phase.

483

484 **Dataset S3** (data provided in a separate file)

485 List of p-values and log<sub>2</sub> fold-changes (log<sub>2</sub>FC) calculated for the absolute mitochondrial  
486 proteome used in the generation of the Volcano plots (Figure 3 a-c) and to identify  
487 significant changes in protein abundance.

488

489 **Dataset S4** (data provided in a separate file)

490 Differentially expressed proteins in the three metabolic phases of yeast growth graphically  
491 showed in the Venn diagram (Figure 3 d-e).

492

493 **Dataset S5** (data provided in a separate file)

494 GO term enrichment for significantly regulated mitochondrial proteins.

495

496 **Dataset S6** (data provided in a separate file)

497 GO term groups associated with each cellular protein.

498

499 **Dataset S7** (data provided in a separate file)

500 GO term groups associated with each mitochondrial protein.

501

502

503

504
